# Supplementary material
Source: publisher site journal article supplement (https://www.dovepress.com/article/432569)
Supplement: Supplementary file 1 [file get_supplementary_file.php]

**Appendix 1: Motivated Strategies for Learning Questionnaire Self-efficacy**

**Number and Algebra (6 items)**

1. I’m certain that I can understand what is taught in a Number and Algebra class

A. Completely nonconforming B. Some nonconforming C. Slightly nonconforming

D. General E. Slightly conforming F. Some conforming G. Completely conforming

2. I expect to do very well in a Number and Algebra class

A. Completely nonconforming B. Some nonconforming C. Slightly nonconforming

D. General E. Slightly conforming F. Some conforming G. Completely conforming

3. I am sure that I can do an excellent job on the problems and tasks assigned for a Number and Algebra class

A. Completely nonconforming B. Some nonconforming C. Slightly nonconforming

D. General E. Slightly conforming F. Some conforming G. Completely conforming

4. I know that I will be able to learn the material for a Number and Algebra class

A. Completely nonconforming B. Some nonconforming C. Slightly nonconforming

D. General E. Slightly conforming F. Some conforming G. Completely conforming

5. My study skills are excellent in a Number and Algebra class

A. Completely nonconforming B. Some nonconforming C. Slightly nonconforming

D. General E. Slightly conforming F. Some conforming G. Completely conforming

6. I think I will receive a good grade in Number and Algebra class

A. Completely nonconforming B. Some nonconforming C. Slightly nonconforming

D. General E. Slightly conforming F. Some conforming G. Completely conforming

**Graphics and Geometry (6 items)**

1. I’m certain that I can understand what is taught in a Graphics and Geometry class

A. Completely nonconforming B. Some nonconforming C. Slightly nonconforming

D. General E. Slightly conforming F. Some conforming G. Completely conforming

2. I expect to do very well in a Graphics and Geometry class

A. Completely nonconforming B. Some nonconforming C. Slightly nonconforming

D. General E. Slightly conforming F. Some conforming G. Completely conforming

3. I am sure that I can do an excellent job on the problems and tasks assigned for a Graphics and Geometry class

A. Completely nonconforming B. Some nonconforming C. Slightly nonconforming

D. General E. Slightly conforming F. Some conforming G. Completely conforming

4. I know that I will be able to learn the material for a Graphics and Geometry class

A. Completely nonconforming B. Some nonconforming C. Slightly nonconforming

D. General E. Slightly conforming F. Some conforming G. Completely conforming

5. My study skills are excellent in a Graphics and Geometry class

A. Completely nonconforming B. Some nonconforming C. Slightly nonconforming

D. General E. Slightly conforming F. Some conforming G. Completely conforming

6. I think I will receive a good grade in Graphics and Geometry class

A. Completely nonconforming B. Some nonconforming C. Slightly nonconforming

D. General E. Slightly conforming F. Some conforming G. Completely conforming

**Synthesis and Practice (6 items)**

1. I’m certain that I can understand what is taught in a Synthesis and Practice class

A. Completely nonconforming B. Some nonconforming C. Slightly nonconforming

D. General E. Slightly conforming F. Some conforming G. Completely conforming

2. I expect to do very well in a Synthesis and Practice class

A. Completely nonconforming B. Some nonconforming C. Slightly nonconforming

D. General E. Slightly conforming F. Some conforming G. Completely conforming

3. I am sure that I can do an excellent job on the problems and tasks assigned for a Synthesis and Practice class

A. Completely nonconforming B. Some nonconforming C. Slightly nonconforming

D. General E. Slightly conforming F. Some conforming G. Completely conforming

4. I know that I will be able to learn the material for a Synthesis and Practice class

A. Completely nonconforming B. Some nonconforming C. Slightly nonconforming

D. General E. Slightly conforming F. Some conforming G. Completely conforming

5. My study skills are excellent in a Synthesis and Practice class

A. Completely nonconforming B. Some nonconforming C. Slightly nonconforming

D. General E. Slightly conforming F. Some conforming G. Completely conforming

6. I think I will receive a good grade in Synthesis and Practice class

A. Completely nonconforming B. Some nonconforming C. Slightly nonconforming

D. General E. Slightly conforming F. Some conforming G. Completely conforming

**Appendix 2: Dimensions of Students’ Mathematics Self-efficacy Questionnaire**

**Students’ lack of interest in and fear of mathematics (13 items)**

1. I’m hopeless when it comes to mathematics

A. Completely nonconforming B. Some nonconforming C. Slightly nonconforming

D. General E. Slightly conforming F. Some conforming G. Completely conforming

2. When I find math homework difficulty, I usually give up on it

A. Completely nonconforming B. Some nonconforming C. Slightly nonconforming

D. General E. Slightly conforming F. Some conforming G. Completely conforming

3. Mathematics is boring

A. Completely nonconforming B. Some nonconforming C. Slightly nonconforming

D. General E. Slightly conforming F. Some conforming G. Completely conforming

4. Mathematics makes me feel uncomfortable and nervous

A. Completely nonconforming B. Some nonconforming C. Slightly nonconforming

D. General E. Slightly conforming F. Some conforming G. Completely conforming

5. I get real uptight during math tests

A. Completely nonconforming B. Some nonconforming C. Slightly nonconforming

D. General E. Slightly conforming F. Some conforming G. Completely conforming

6. When I am taking math tests, I usually feel nervous and uneasy

A. Completely nonconforming B. Some nonconforming C. Slightly nonconforming

D. General E. Slightly conforming F. Some conforming G. Completely conforming

7. I dread having to do math

A. Completely nonconforming B. Some nonconforming C. Slightly nonconforming

D. General E. Slightly conforming F. Some conforming G. Completely conforming

8. The thought of taking advanced high school math courses scares me

A. Completely nonconforming B. Some nonconforming C. Slightly nonconforming

D. General E. Slightly conforming F. Some conforming G. Completely conforming

9. When the teacher calls on me in class to answer a math question or solve a math problem, I worry that I will do poorly

A. Completely nonconforming B. Some nonconforming C. Slightly nonconforming

D. General E. Slightly conforming F. Some conforming G. Completely conforming

10. Mathematics makes me feel inadequate

A. Completely nonconforming B. Some nonconforming C. Slightly nonconforming

D. General E. Slightly conforming F. Some conforming G. Completely conforming

11. I have trouble understanding anything that is based upon mathematics; (12) I never do well on tests that require mathematical reasoning

A. Completely nonconforming B. Some nonconforming C. Slightly nonconforming

D. General E. Slightly conforming F. Some conforming G. Completely conforming

12. I never do well on tests that require mathematical reasoning

A. Completely nonconforming B. Some nonconforming C. Slightly nonconforming

D. General E. Slightly conforming F. Some conforming G. Completely conforming

13. I have never been very excited about mathematics

A. Completely nonconforming B. Some nonconforming C. Slightly nonconforming

D. General E. Slightly conforming F. Some conforming G. Completely conforming

**Relative competence in mathematics (9 items)**

1. Compared to the boys in my math class, I am good at mathematics

A. Completely nonconforming B. Some nonconforming C. Slightly nonconforming

D. General E. Slightly conforming F. Some conforming G. Completely conforming

2. Compared to the boys in my school, I am good at mathematics

A. Completely nonconforming B. Some nonconforming C. Slightly nonconforming

D. General E. Slightly conforming F. Some conforming G. Completely conforming

3. Compared to the girls in my math class, I am good at mathematics

A. Completely nonconforming B. Some nonconforming C. Slightly nonconforming

D. General E. Slightly conforming F. Some conforming G. Completely conforming

4. Compared to the girls in my school, I am good at mathematics

A. Completely nonconforming B. Some nonconforming C. Slightly nonconforming

D. General E. Slightly conforming F. Some conforming G. Completely conforming

5. Compared to all students in my math class, I am good at mathematics

A. Completely nonconforming B. Some nonconforming C. Slightly nonconforming

D. General E. Slightly conforming F. Some conforming G. Completely conforming

6. Compared to other students my age, I am good at mathematics

A. Completely nonconforming B. Some nonconforming C. Slightly nonconforming

D. General E. Slightly conforming F. Some conforming G. Completely conforming

7. I get good grades in mathematics

A. Completely nonconforming B. Some nonconforming C. Slightly nonconforming

D. General E. Slightly conforming F. Some conforming G. Completely conforming

8. I learn things quickly in mathematics

A. Completely nonconforming B. Some nonconforming C. Slightly nonconforming

D. General E. Slightly conforming F. Some conforming G. Completely conforming

9. I have always done well in mathematics

A. Completely nonconforming B. Some nonconforming C. Slightly nonconforming

D. General E. Slightly conforming F. Some conforming G. Completely conforming

**Self-confidence and competence in mathematics (9 items)**

1. Work in mathematics classes is easy for me

A. Completely nonconforming B. Some nonconforming C. Slightly nonconforming

D. General E. Slightly conforming F. Some conforming G. Completely conforming

2. I enjoy doing mathematics homework

A. Completely nonconforming B. Some nonconforming C. Slightly nonconforming

D. General E. Slightly conforming F. Some conforming G. Completely conforming

3. I have usually been at ease and relaxed during math tests

A. Completely nonconforming B. Some nonconforming C. Slightly nonconforming

D. General E. Slightly conforming F. Some conforming G. Completely conforming

4. I feel calm and relaxed when I work with mathematics

A. Completely nonconforming B. Some nonconforming C. Slightly nonconforming

D. General E. Slightly conforming F. Some conforming G. Completely conforming

5. It does not scare me to take math test

A. Completely nonconforming B. Some nonconforming C. Slightly nonconforming

D. General E. Slightly conforming F. Some conforming G. Completely conforming

6. I have generally done better in mathematics courses than in other courses

A. Completely nonconforming B. Some nonconforming C. Slightly nonconforming

D. General E. Slightly conforming F. Some conforming G. Completely conforming

7. I am quite good at mathematics

A. Completely nonconforming B. Some nonconforming C. Slightly nonconforming

D. General E. Slightly conforming F. Some conforming G. Completely conforming

8. I have always done well in mathematics classes

A. Completely nonconforming B. Some nonconforming C. Slightly nonconforming

D. General E. Slightly conforming F. Some conforming G. Completely conforming

9. At school, my friends come to me for help in mathematics

A. Completely nonconforming B. Some nonconforming C. Slightly nonconforming

D. General E. Slightly conforming F. Some conforming G. Completely conforming

**Interest in, effort in, and perception of the importance of mathematics (8 items)**

1. It is important to me to get good grades in mathematics

A. Completely nonconforming B. Some nonconforming C. Slightly nonconforming

D. General E. Slightly conforming F. Some conforming G. Completely conforming

2. Being good in mathematics is important to me

A. Completely nonconforming B. Some nonconforming C. Slightly nonconforming

D. General E. Slightly conforming F. Some conforming G. Completely conforming

3. Solving math problems is interesting for me

A. Completely nonconforming B. Some nonconforming C. Slightly nonconforming

D. General E. Slightly conforming F. Some conforming G. Completely conforming

4. I find mathematics interesting

A. Completely nonconforming B. Some nonconforming C. Slightly nonconforming

D. General E. Slightly conforming F. Some conforming G. Completely conforming

5. When a math problem is difficult for me to solve, I just put more effort into it

A. Completely nonconforming B. Some nonconforming C. Slightly nonconforming

D. General E. Slightly conforming F. Some conforming G. Completely conforming

6. I will work as long as necessary to solve a difficult math problem

A. Completely nonconforming B. Some nonconforming C. Slightly nonconforming

D. General E. Slightly conforming F. Some conforming G. Completely conforming

7. I believe I could be a mathematician or scientist when I grow up

A. Completely nonconforming B. Some nonconforming C. Slightly nonconforming

D. General E. Slightly conforming F. Some conforming G. Completely conforming

8. I find many mathematical problems interesting and challenging

A. Completely nonconforming B. Some nonconforming C. Slightly nonconforming

D. General E. Slightly conforming F. Some conforming G. Completely conforming

**Mathematics anxiety (5 items)**

1. I get real uptight during math tests

A. Completely nonconforming B. Some nonconforming C. Slightly nonconforming

D. General E. Slightly conforming F. Some conforming G. Completely conforming

2. I get a sinking feeling when I think of trying hard math problems

A. Completely nonconforming B. Some nonconforming C. Slightly nonconforming

D. General E. Slightly conforming F. Some conforming G. Completely conforming

3. My mind goes blank and I am unable to think clearly when doing mathematics

A. Completely nonconforming B. Some nonconforming C. Slightly nonconforming

D. General E. Slightly conforming F. Some conforming G. Completely conforming

4. Mathematics makes me feel uncomfortable and nervous

A. Completely nonconforming B. Some nonconforming C. Slightly nonconforming

D. General E. Slightly conforming F. Some conforming G. Completely conforming

5. Mathematics makes me feel uneasy and confused

A. Completely nonconforming B. Some nonconforming C. Slightly nonconforming

D. General E. Slightly conforming F. Some conforming G. Completely conforming
